# Supplementary material for: The Role of Gene Duplication and Unconstrained Selective Pressures in the Melanopsin Gene Family Evolution and Vertebrate Circadian Rhythm Regulation
Source: PubMed Central journal article supplement (PMC3528684; doi:10.1371/journal.pone.0052413), 2012-12-21

| Branch models         | Likelihood | $p$ | $\omega$ | LRT    | $df$ |   |  |
|-----------------------|------------|-----|----------|--------|------|---|--|
| <i>OPN4m/OPN4x</i>    |            |     |          |        |      |   |  |
| Model O               | -20998.594 | 92  | 0.077    |        |      |   |  |
| Model A               | -20998.323 | 93  | 0.006    | 0.541  | 1    |   |  |
| Model B <i>OPN4x</i>  | -20992.982 | 93  | $\infty$ | 11.223 | 1    | * |  |
| Model C <i>OPN4m</i>  | -20994.886 | 93  | $\infty$ | 7.416  | 1    | * |  |
| <i>OPN4m3/OPN4ma</i>  |            |     |          |        |      |   |  |
| Model O               | -12319.188 | 46  | 0.089    |        |      |   |  |
| Model A               | -12317.165 | 47  | $\infty$ | 4.046  | 1    | * |  |
| Model B <i>OPN4m3</i> | -12317.518 | 47  | 0.209    | 3.338  | 1    |   |  |
| Model C <i>OPN4ma</i> | -12318.228 | 47  | 0.296    | 1.920  | 1    |   |  |
| <i>OPN4x1/OPN4x2</i>  |            |     |          |        |      |   |  |
| Model O               | -10568.326 | 38  | 0.089    |        |      |   |  |
| Model A               | -10568.035 | 39  | 0.063    | 0.582  | 1    |   |  |
| Model B <i>OPN4x2</i> | -10566.161 | 39  | $\infty$ | 4.330  | 1    | * |  |
| Model C <i>OPN4x1</i> | -10566.122 | 39  | 0.902    | 4.408  | 1    | * |  |

| Branch site models    | Likelihood | $p$ | $\omega$ | $p+$  | LRT    | $df$ |   |
|-----------------------|------------|-----|----------|-------|--------|------|---|
| <i>OPN4m/OPN4x</i>    |            |     |          |       |        |      |   |
| Model O               | -20819.380 | 94  |          |       |        |      |   |
| Model A               | -20814.236 | 95  | 159.543  | 0.168 | 10.289 | 1    | * |
| Model B <i>OPN4x</i>  | -20814.352 | 95  | $\infty$ | 0.248 | 10.056 | 1    | * |
| Model C <i>OPN4m</i>  | -20817.482 | 95  | $\infty$ | 0.183 | 3.794  | 1    |   |
| <i>OPN4m3/OPN4ma</i>  |            |     |          |       |        |      |   |
| Model O               | -12108.048 | 48  |          |       |        |      |   |
| Model A               | -12103.212 | 49  | 667.161  | 0.027 | 9.673  | 1    | * |
| Model B <i>OPN4m3</i> | -12088.628 | 49  | 593.875  | 0.110 | 38.841 | 1    | * |
| Model C <i>OPN4ma</i> | -12107.509 | 49  | 13.128   | 0.019 | 1.079  | 1    |   |
| <i>OPN4x1/OPN4x2</i>  |            |     |          |       |        |      |   |
| Model O               | -10461.138 | 40  |          |       |        |      |   |
| Model A               | -10461.138 | 41  | 1.000    | 0.087 | 0.000  | 1    |   |
| Model B <i>OPN4x2</i> | -10464.285 | 41  | $\infty$ | 0.032 | 6.294  | 1    | * |
| Model C <i>OPN4x1</i> | -10458.370 | 41  | 33.942   | 0.050 | 5.537  | 1    | * |

### Legend

- $p$  number of parameters
- $\omega$  omega-value
- LRT likelihood ratio test
- $df$  degrees of freedom
- $p+$  proportion of positively selected sites

### Models

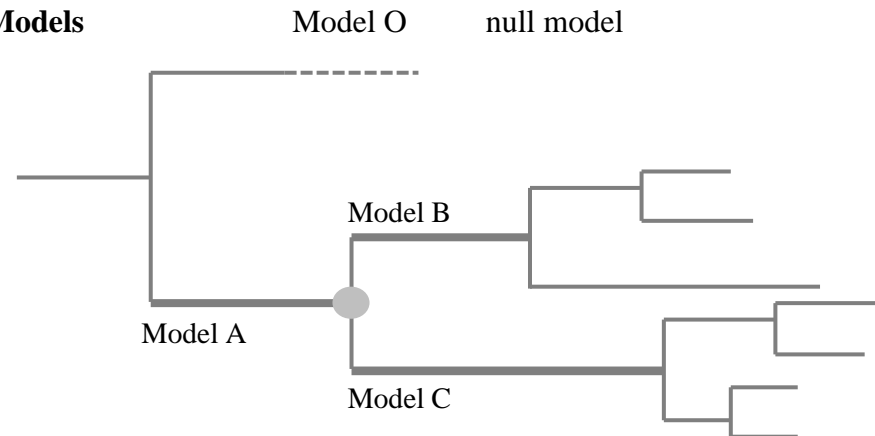

Supplement: pone.0052413.s005.pdf [file pone.0052413.s005.pdf]
