# Supplementary material for: The Role of Gene Duplication and Unconstrained Selective Pressures in the Melanopsin Gene Family Evolution and Vertebrate Circadian Rhythm Regulation
Source: PubMed Central journal article supplement (PMC3528684; doi:10.1371/journal.pone.0052413), 2012-12-21

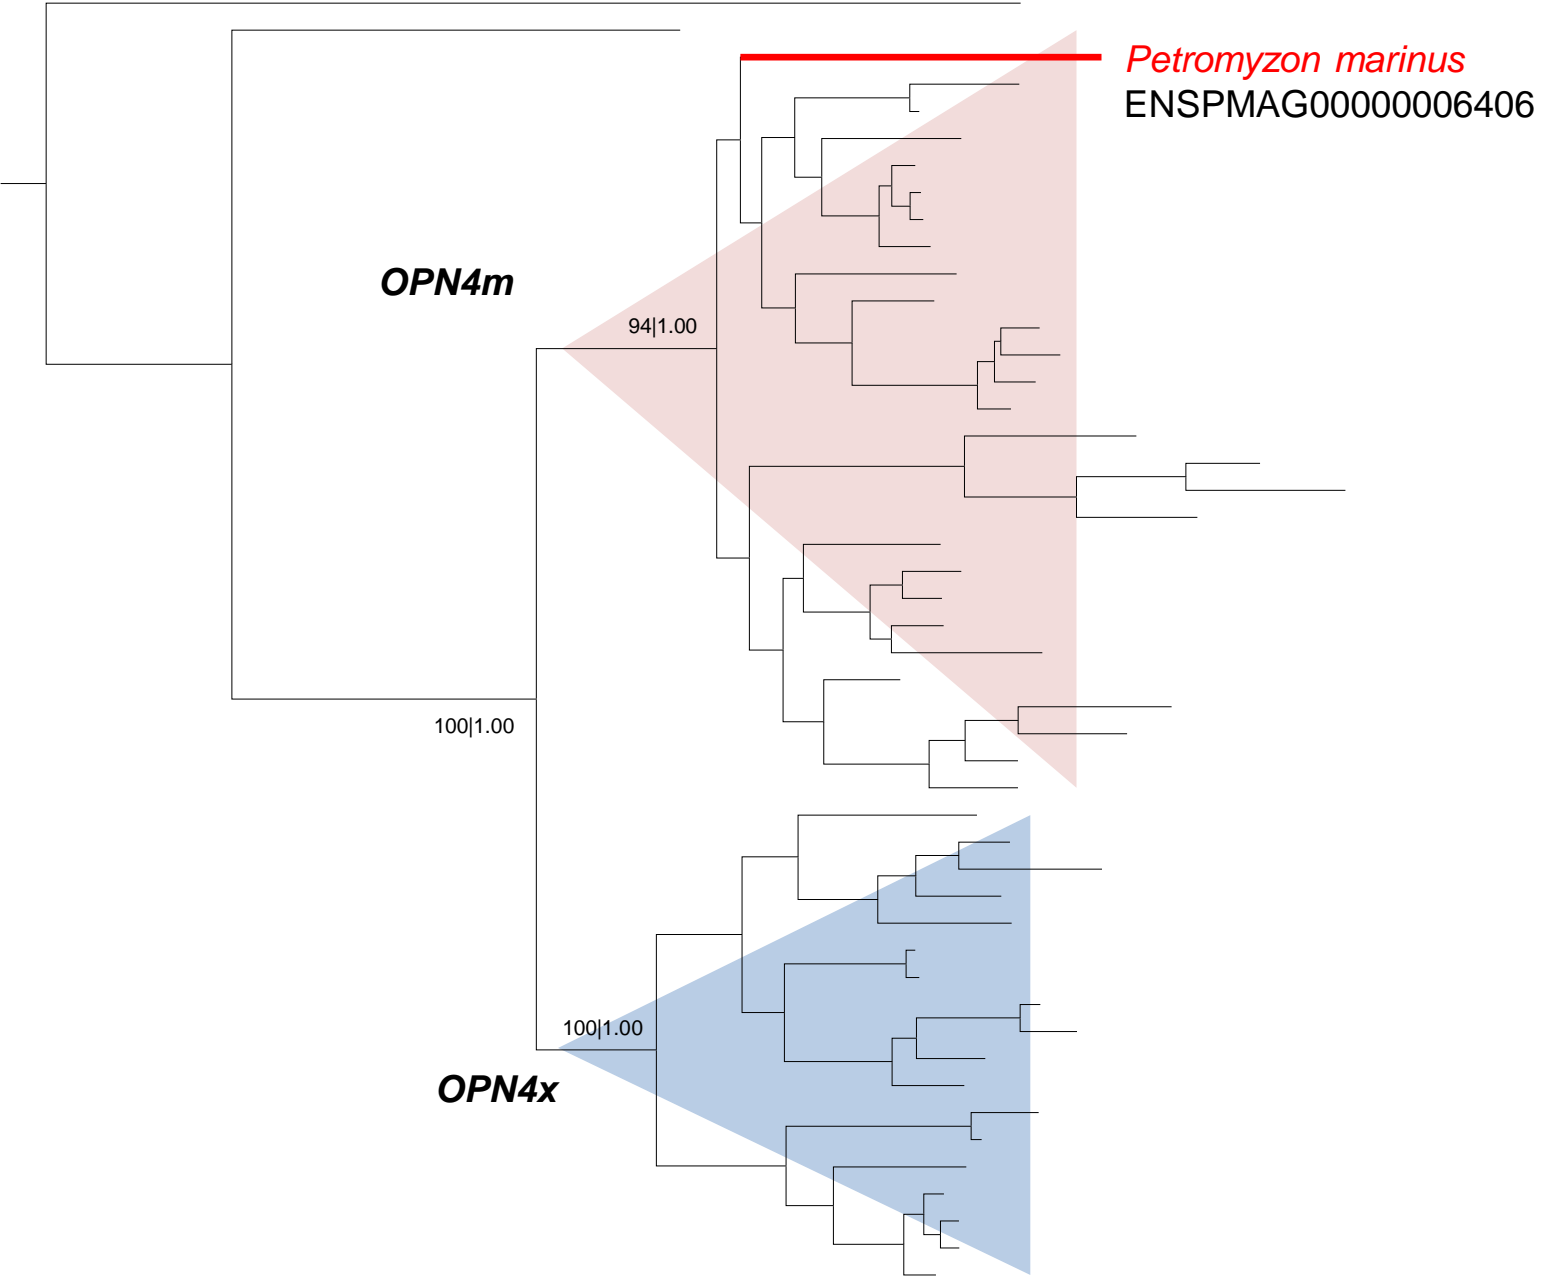

Supplement: pone.0052413.s001.pdf [file pone.0052413.s001.pdf]
