# Supplementary material for: The Role of Gene Duplication and Unconstrained Selective Pressures in the Melanopsin Gene Family Evolution and Vertebrate Circadian Rhythm Regulation
Source: PubMed Central journal article supplement (PMC3528684; doi:10.1371/journal.pone.0052413), 2012-12-21
Supplement: pone.0052413.s003.pdf [file pone.0052413.s003.pdf]

| <b>Specie</b>                            | <b>Name</b>         | <b>NCBI/ENSEMBLE</b> | <b>Paralog</b> |
|------------------------------------------|---------------------|----------------------|----------------|
| <i>Strongylocentrotus droebachiensis</i> | S. droebachiensis   | DQ285097.1           | .              |
| <i>Strongylocentrotus purpuratus</i>     | S. purpuratus       | XM_779466.2          | .              |
| <i>Branchiostoma floridae</i>            | B. floridae         | XM_002596237.1       | .              |
| <i>Branchiostoma belcherii</i>           | B. belcherii        | AB205400.1           | .              |
| <i>Danio rerio</i>                       | D. rerio 1          | ENSDARG00000051908   | <i>x</i>       |
|                                          | D. rerio 2          | ENSDART00000108727   | <i>x</i>       |
|                                          | D. rerio 5          | ENSDARG00000007553   | <i>m</i>       |
|                                          | D. rerio 6          | XM_689400.2          | <i>m</i>       |
| <i>Takifugu rubripes</i>                 | T. rubripes 1       | ENSTRUG00000013541   | <i>x</i>       |
|                                          | T. rubripes 2       | ENSTRUT00000015619   | <i>x</i>       |
|                                          | T. rubripes 3       | ENSTRUG00000011365   | <i>m</i>       |
|                                          | T. rubripes 4       | ENSTRUG00000000307   | <i>m</i>       |
| <i>Gasterosteus aculeatus</i>            | G. aculeatus 1      | ENSGACG00000016885   | <i>x</i>       |
|                                          | G. aculeatus 2      | ENSGACG00000007757   | <i>x</i>       |
|                                          | G. aculeatus 4      | ENSGACG00000011528   | <i>m</i>       |
|                                          | T. nigroviridis 2   | ENSTNIG00000009056   | <i>x</i>       |
|                                          | T. nigroviridis 3   | ENSTNIG00000003074   | <i>m</i>       |
| <i>Oryzias latipes</i>                   | T. nigroviridis 4   | ENSTNIG00000007169   | <i>m</i>       |
|                                          | O. latipes 1        | ENSORLG00000005512   | <i>x</i>       |
|                                          | O. latipes 2        | ENSORLG00000007864   | <i>x</i>       |
|                                          | O. latipes 3        | ENSORLG00000007679   | <i>m</i>       |
| <i>Ictalurus punctatus</i>               | O. latipes 4        | ENSORLG00000010483   | <i>m</i>       |
|                                          | I. punctatus 1      | NM_001200310.1       | <i>m</i>       |
|                                          | I. punctatus 2      | FJ839437.1           | <i>m</i>       |
|                                          | <i>Gadus morhua</i> | G. morhua1           | AF385823.1     |
| G. morhua2                               |                     | AY126448.1           | <i>x</i>       |
| <i>Coryphaenoides armatus</i>            | C. armatus 1        | EU479707.1           | <i>x</i>       |
| <i>Astatotilapia burtoni</i>             | A. burtoni          | EU523855.1           | <i>m</i>       |
| <i>Rutilus rutilus</i>                   | R. rutilus          | AY226847.1           | <i>m</i>       |
| <i>Xenopus laevis</i>                    | X. laevis 1         | AF014797.1           | <i>x</i>       |
| <i>Anolis carolinensis</i>               | A. carolinensis 1   | XM_003221173.1       | <i>x</i>       |
| <i>Podarcis siculus</i>                  | P. siculus          | DQ013043.2           | <i>x</i>       |
| <i>Gallus gallus</i>                     | G. gallus 1         | ENSGALG00000010408   | <i>x</i>       |
|                                          | G. gallus 2         | ENSGALG00000001934   | <i>m</i>       |
| <i>Meleagris galopavo</i>                | M. galopavo 1       | ENSMGAG00000005644   | <i>x</i>       |
|                                          | M. galopavo 2       | ENSMGAG00000002543   | <i>m</i>       |
| <i>Anas platyrhynchos</i>                | A. platyrhynchos 1  | ENSAPLG00000004330   | <i>x</i>       |
|                                          | A. platyrhynchos 2  | ENSAPLG00000014594   | <i>m</i>       |
| <i>Taeniopygia guttata</i>               | T. guttata 1        | ENSTGUG00000003147   | <i>x</i>       |
|                                          | T. guttata 2        | ENSTGUG00000005687   | <i>m</i>       |
| <i>Sminthopsis crassicaudata</i>         | S. crassicaudata    | DQ383281.1           | <i>m</i>       |
| <i>Monodelphis domestica</i>             | M. domestica        | ENSMODG00000011114   | <i>m</i>       |
| <i>Homo sapiens</i>                      | H. sapiens          | ENSG00000122375      | <i>m</i>       |
| <i>Canis familiaris</i>                  | C. familiaris       | ENSCAFG00000015975   | <i>m</i>       |
| <i>Loxodonta africana</i>                | L. africana         | ENSLAFG00000006004   | <i>m</i>       |
| <i>Rattus norvegicus</i>                 | R. norvegicus       | ENSRNOG00000011600   | <i>m</i>       |
