# Supplementary material for: The Role of Gene Duplication and Unconstrained Selective Pressures in the Melanopsin Gene Family Evolution and Vertebrate Circadian Rhythm Regulation
Source: PubMed Central journal article supplement (PMC3528684; doi:10.1371/journal.pone.0052413), 2012-12-21
Supplement: pone.0052413.s004.pdf [file pone.0052413.s004.pdf]

|                                       |          | <i>OPN4m</i>                     |       | <i>OPN4x</i>                     |       |             |
|---------------------------------------|----------|----------------------------------|-------|----------------------------------|-------|-------------|
| Amino acid properties                 |          | Number of positive destabilizing | $f_r$ | Number of positive destabilizing | $f_r$ |             |
| Bulkiness                             | $B_r$    | 58                               | 0.048 | 36                               | 0.033 |             |
| Chromatographic index                 | $R_F$    | 127                              | 0.105 | 121                              | 0.113 |             |
| Hydropathy                            | $h$      | 67                               | 0.055 | 85                               | 0.079 |             |
| Isoelectric point                     | $pH_i$   | 165                              | 0.136 | 160                              | 0.149 |             |
| Normalized consensus hydrophobicity   | $H_{nc}$ | 12                               | 0.010 | 18                               | 0.017 |             |
| Polar requirement                     | $P_r$    | 67                               | 0.055 | 69                               | 0.064 |             |
| Polarity                              | $p$      | 87                               | 0.072 | 86                               | 0.080 |             |
| Refractive index                      | $\mu$    | 62                               | 0.051 | 39                               | 0.036 |             |
| Solvent accessible reduction ratio    | $R_a$    | 150                              | 0.123 | 119                              | 0.111 |             |
| Surrounding hydrophobicity            | $H_p$    | 84                               | 0.069 | 65                               | 0.060 | Chemical    |
| Thermodynamic transfer hydrophobicity | $H_t$    | 11                               | 0.009 | 8                                | 0.007 | 0.733 0.750 |
| Compressibility                       | $K^0$    | 101                              | 0.083 | 120                              | 0.112 |             |
| Helical contact area                  | $C_a$    | 71                               | 0.058 | 50                               | 0.047 |             |
| Molecular volume                      | $M_v$    | 47                               | 0.039 | 22                               | 0.020 |             |
| Partial specific volume               | $V^0$    | 63                               | 0.052 | 56                               | 0.052 | Structural  |
| Molecular weight                      | $M_w$    | 43                               | 0.035 | 21                               | 0.020 | 0.267 0.250 |
| <b>Total</b>                          |          | 1215                             |       | 1075                             |       |             |

\* 15 chemical and 15 structural properties were analysed but only the represented give significant results.

**Legend:**

$f_r$  relative frequency of substitutions for each propertie
