# Supplementary material for: The Role of Gene Duplication and Unconstrained Selective Pressures in the Melanopsin Gene Family Evolution and Vertebrate Circadian Rhythm Regulation
Source: PubMed Central journal article supplement (PMC3528684; doi:10.1371/journal.pone.0052413), 2012-12-21
Supplement: pone.0052413.s006.pdf [file pone.0052413.s006.pdf]

Nucleotide substitution model

|             | <i>OPN4m</i> | <i>OPN4x</i> | <i>OPN4</i> |
|-------------|--------------|--------------|-------------|
| Model       | GTR+I+G      | GTR+I+G      | GTR+I+G     |
| A           | 0.179        | 0.233        | 0.197       |
| C           | 0.337        | 0.285        | 0.314       |
| G           | 0.267        | 0.234        | 0.255       |
| T           | 0.218        | 0.249        | 0.234       |
| $r[AC]$     | 1.117        | 1.619        | 1.374       |
| $r[AG]$     | 3.663        | 3.822        | 3.724       |
| $r[AT]$     | 1.359        | 1.137        | 1.355       |
| $r[CG]$     | 0.884        | 1.290        | 0.924       |
| $r[CT]$     | 3.271        | 3.364        | 3.337       |
| $r[GT]$     | 1.000        | 1.000        | 1.000       |
| p-inv       | 0.090        | 0.246        | 0.227       |
| gamma shape | 1.430        | 1.242        | 0.745       |

Xia et al. 2003 saturation test

|            | <i>OPN4m</i>      | <i>OPN4x</i>      | <i>OPN4</i>       |
|------------|-------------------|-------------------|-------------------|
| ISS        | 0.385             | 0.366             | 0.473             |
| ISS.c      | 0.767             | 0.767             | 0.775             |
| $t$ -test  | 18.088            | 19.826            | 14.504            |
| $df$       | 991               | 1022              | 885               |
| $p$ -value | 0.000             | 0.000             | 0.000             |
|            | Little saturation | Little saturation | Little saturation |
